# Supplementary material for: Assessment of risk for asthma initiation and cancer and heart disease deaths among patrons and servers due to secondhand smoke exposure in restaurants and bars
Source: PubMed Central journal article supplement — Tob Control. 2013 Feb 13;23(4):332–8. doi: 10.1136/tobaccocontrol-2012-050831 (PMC4078683; doi:10.1136/tobaccocontrol-2012-050831), 2013-02-13
Supplement: tobaccocontrol-2012-050831-s1.pdf [file tobaccocontrol-2012-050831-s1.pdf]

## Supplementary Materials

Table S1 SHS PM<sub>2.5</sub> concentrations in restaurants and bars by different time of day and different day of week,  $\mu\text{g}/\text{m}^3$ , Minnesota, 2007

|             |          |         | SHS PM <sub>2.5</sub> , mean (SE) |                                   |                                   |                                      |                                       |                                 |
|-------------|----------|---------|-----------------------------------|-----------------------------------|-----------------------------------|--------------------------------------|---------------------------------------|---------------------------------|
|             |          |         | n of visit                        | venue avg unweighted <sup>a</sup> | venue avg weighted 1 <sup>b</sup> | patrons_smks weighted 2 <sup>c</sup> | patrons_nsmks weighted 3 <sup>d</sup> | workers weighted 4 <sup>e</sup> |
| Restaurants | weekday  | Lunch   | 142                               | 35 (5)                            | 40 (13)                           | 75 (36)                              | 14 (3)                                | 36 (14)                         |
|             |          | Dinner  | 154                               | 71 (7)                            | 66 (13)                           | 105 (13)                             | 26 (4)                                | 65 (10)                         |
|             |          | Evening | 154                               | 64 (6)                            | 59 (10)                           | 105 (17)                             | 27 (6)                                | 59 (11)                         |
|             | Friday   | Lunch   | 134                               | 30 (4)                            | 36 (10)                           | 76 (29)                              | 12 (5)                                | 34 (12)                         |
|             |          | Dinner  | 187                               | 91 (7)                            | 87 (16)                           | 136 (24)                             | 39 (5)                                | 83 (14)                         |
|             |          | Evening | 160                               | 108 (9)                           | 98 (14)                           | 158 (14)                             | 54 (13)                               | 107 (11)                        |
|             | Saturday | Lunch   | 150                               | 29 (4)                            | 29 (7)                            | 66 (21)                              | 9 (2)                                 | 32 (8)                          |
|             |          | Dinner  | 188                               | 53 (4)                            | 59 (9)                            | 93 (15)                              | 32 (7)                                | 51 (7)                          |
|             |          | Evening | 165                               | 90 (9)                            | 76 (13)                           | 151 (42)                             | 31 (6)                                | 88 (21)                         |
|             | Sunday   | Lunch   | 127                               | 31 (4)                            | 34 (5)                            | 57 (11)                              | 10 (3)                                | 32 (6)                          |
|             |          | Dinner  | 127                               | 60 (7)                            | 50 (11)                           | 92 (17)                              | 24 (4)                                | 52 (10)                         |
|             |          | Evening | 140                               | 61 (7)                            | 58 (10)                           | 98 (16)                              | 17 (2)                                | 56 (10)                         |
| Bars        | weekday  | Lunch   | 62                                | 31 (6)                            | 38 (8)                            | 43 (13)                              | 9 (1)                                 | 28 (6)                          |
|             |          | Dinner  | 65                                | 136 (17)                          | 158 (51)                          | 197 (56)                             | 54 (10)                               | 140 (38)                        |
|             |          | Evening | 61                                | 155 (19)                          | 159 (27)                          | 181 (25)                             | 62 (19)                               | 156 (18)                        |
|             | Friday   | Lunch   | 63                                | 27 (4)                            | 29 (5)                            | 29 (5)                               | 24 (1)                                | 22 (4)                          |
|             |          | Dinner  | 66                                | 180 (24)                          | 191 (42)                          | 217 (63)                             | 51 (5)                                | 164 (36)                        |
|             |          | Evening | 77                                | 155 (19)                          | 133 (18)                          | 189 (32)                             | 32 (4)                                | 151 (21)                        |
|             | Saturday | Lunch   | 61                                | 45 (10)                           | 51 (16)                           | 88 (26)                              | 26 (3)                                | 38 (9)                          |
|             |          | Dinner  | 70                                | 114 (11)                          | 124 (25)                          | 129 (24)                             | 49 (4)                                | 105 (17)                        |
|             |          | Evening | 75                                | 154 (22)                          | 150 (27)                          | 214 (36)                             | 54 (3)                                | 155 (26)                        |
|             | Sunday   | Lunch   | 56                                | 41 (9)                            | 56 (18)                           | 78 (16)                              | 4 (3)                                 | 48 (12)                         |
|             |          | Dinner  | 58                                | 91 (14)                           | 112 (24)                          | 145 (29)                             | 49 (4)                                | 95 (15)                         |
|             |          | Evening | 64                                | 99 (11)                           | 123 (28)                          | 166 (47)                             | 145 (9)                               | 139 (33)                        |
| All         | weekday  | Lunch   | 204                               | 34 (4)                            | 40 (8)                            | 63 (24)                              | 14 (2)                                | 33 (10)                         |
|             |          | Dinner  | 219                               | 90 (7)                            | 98 (20)                           | 143 (26)                             | 31 (4)                                | 90 (13)                         |
|             |          | Evening | 215                               | 89 (8)                            | 95 (12)                           | 140 (15)                             | 33 (7)                                | 90 (10)                         |
|             | Friday   | Lunch   | 197                               | 29 (3)                            | 33 (7)                            | 60 (21)                              | 15 (4)                                | 30 (9)                          |
|             |          | Dinner  | 253                               | 114 (8)                           | 123 (18)                          | 170 (29)                             | 42 (4)                                | 105 (13)                        |
|             |          | Evening | 237                               | 123 (9)                           | 111 (11)                          | 172 (16)                             | 53 (12)                               | 120 (9)                         |
|             | Saturday | Lunch   | 211                               | 34 (4)                            | 38 (7)                            | 75 (16)                              | 12 (3)                                | 34 (6)                          |
|             |          | Dinner  | 258                               | 69 (5)                            | 82 (11)                           | 107 (13)                             | 34 (6)                                | 66 (7)                          |
|             |          | Evening | 240                               | 110 (9)                           | 103 (13)                          | 178 (28)                             | 35 (6)                                | 109 (17)                        |
|             | Sunday   | Lunch   | 183                               | 34 (4)                            | 43 (8)                            | 65 (9)                               | 9 (3)                                 | 36 (5)                          |
|             |          | Dinner  | 212                               | 68 (6)                            | 71 (11)                           | 113 (16)                             | 27 (5)                                | 64 (8)                          |
|             |          | Evening | 204                               | 73 (6)                            | 84 (13)                           | 130 (25)                             | 52 (26)                               | 84 (15)                         |
| Total       |          |         | 2633                              | 72 (6)                            | 78 (9)                            | 134 (12)                             | 30 (4)                                | 78 (7)                          |

<sup>a</sup> Sample average SHS PM<sub>2.5</sub> concentration without any weighting;

<sup>b</sup> Average SHS-PM<sub>2.5</sub> concentration by venue type, weighted to estimate average concentrations in the smoking venue/sections before the statewide ban went into effect (weight 1);

<sup>c</sup> Average SHS-PM<sub>2.5</sub> concentration to which patrons visiting only smoking venues/sections are exposed. Weighted by weight 1 and number of patrons in each smoking venue/section (weight 2);

<sup>d</sup> Average SHS PM<sub>2.5</sub> concentration to which patrons visiting only designated non-smoking sections are exposed. Weighted by weight 1 and number of patrons in these section (weight 3);

<sup>e</sup> Average SHS PM<sub>2.5</sub> concentration to which servers working in smoking-permitted restaurants and bars are exposed. Weighted by weight 1 and the proportion of time spent working in designated smoking sections and nonsmoking sections if present (weight 4).

Table S2 Emission factors (EFs) from the literature for SHS specific compounds and volatile organic compounds and ratios of EFs and side-by-side field measurements to PM<sub>2.5</sub> or 3-Ethenylpyridine (3EP)

|                                                     | Mean EF <sup>a</sup><br>μg/cig | range of EF <sup>b</sup><br>μg/cig | ratio of<br>EF <sub>PM</sub> /EF <sub>VOC</sub> | ratio of<br>C <sub>PM</sub> /C <sub>VOC</sub> <sup>c</sup> | ratio of<br>EF <sub>VOC</sub> /EF <sub>3EP</sub> | ratio of<br>C <sub>VOC</sub> /C <sub>3EP</sub> <sup>d</sup> |
|-----------------------------------------------------|--------------------------------|------------------------------------|-------------------------------------------------|------------------------------------------------------------|--------------------------------------------------|-------------------------------------------------------------|
| <b>Selected SHS tracers with field measurements</b> |                                |                                    |                                                 |                                                            |                                                  |                                                             |
| Pyridine                                            | 348                            | 60-530                             | 35.8                                            | 22.4                                                       | 0.83                                             | 1.50                                                        |
| Pyrrole                                             | 373                            | 230-460                            | 33.4                                            | 35.3                                                       | 0.88                                             | 0.97                                                        |
| 3,4-Picoline                                        | 312                            | 264-350                            | 40.0                                            | 41.3                                                       | 0.74                                             | 0.60                                                        |
| 3-Ethenylpyridine                                   | 422                            | 84-660                             | 29.5                                            | 36.3                                                       | 1.00                                             | 1.00                                                        |
| Nicotine                                            | 1274                           | 396-3070                           | 9.8                                             | 14.4                                                       | 3.02                                             | 1.80                                                        |
| Myosmine                                            | 122                            | 83-160                             | 102.6                                           | 169.3                                                      | 0.29                                             | 0.20                                                        |
| PM <sub>2.5</sub>                                   | 12471                          | 8100-17000                         | 1.0                                             | 1.0                                                        | 29.5                                             | 36.3                                                        |
| <b>Volatile organic compounds</b>                   |                                |                                    |                                                 |                                                            |                                                  |                                                             |
| Acetaldehyde                                        | 2292                           | 2042-2496                          | 5.4                                             |                                                            | 5.4                                              |                                                             |
| Acetonitrile                                        | 952                            | 858-1069                           | 13.1                                            |                                                            | 2.3                                              |                                                             |
| Acrolein                                            | 363                            | 284-404                            | 34.4                                            |                                                            | 0.9                                              |                                                             |
| Acrylonitrile                                       | 170                            | 99-250                             | 73.4                                            |                                                            | 0.4                                              |                                                             |
| Benzene                                             | 431                            | 263-590                            | 28.9                                            |                                                            | 1.0                                              |                                                             |
| 1,3-Butadiene                                       | 279                            | 157-400                            | 44.6                                            |                                                            | 0.7                                              |                                                             |
| 2-Butanone                                          | 323                            | 166-540                            | 38.6                                            |                                                            | 0.8                                              |                                                             |
| Cresol                                              | 109                            | 62-148                             | 114.1                                           |                                                            | 0.3                                              |                                                             |
| Ethylbenzene                                        | 131                            | 101-170                            | 95.3                                            |                                                            | 0.3                                              |                                                             |
| Formaldehyde                                        | 1101                           | 243-1333                           | 11.3                                            |                                                            | 2.6                                              |                                                             |
| Isoprene                                            | 2400                           | 1990-2810                          | 5.2                                             |                                                            | 5.7                                              |                                                             |
| Methylnaphthalene                                   | 51                             | 41-61                              | 244.5                                           |                                                            | 0.1                                              |                                                             |
| Naphthalene                                         | 45                             | 34-55                              | 280.3                                           |                                                            | 0.1                                              |                                                             |
| Phenol                                              | 157                            | 26-360                             | 79.3                                            |                                                            | 0.4                                              |                                                             |
| Styrene                                             | 160                            | 141-210                            | 78.1                                            |                                                            | 0.4                                              |                                                             |
| 1,2,4-Trimethylbenzene                              | 56                             | 25-74                              | 221.3                                           |                                                            | 0.1                                              |                                                             |
| Toluene                                             | 777                            | 364-1270                           | 16.0                                            |                                                            | 1.8                                              |                                                             |
| Xylene                                              | 400                            | 135-571                            | 31.2                                            |                                                            | 0.9                                              |                                                             |
| N-Nitrosodimethylamine                              | 0.57                           | 0.34-0.79                          | 22073                                           |                                                            | 0.0013                                           |                                                             |
| N-Nitrosopyrrolidine                                | 0.10                           | 0.07-0.14                          | 119918                                          |                                                            | 0.00025                                          |                                                             |

<sup>a</sup> average of emission factors (EFs) reported by.<sup>1-10</sup>

<sup>b</sup> range of EFs indicates the range of means of EFs reported by different studies, except N-Nitrosodimethylamine and N-Nitrosopyrrolidine, for which ranges represent 95% confidence intervals reported in the single study by<sup>7</sup>;

<sup>c</sup> ratios of concentration of PM<sub>2.5</sub>(C<sub>PM</sub>) to concentration of volatile organic compound (C<sub>VOC</sub>) were derived from simple linear regression analysis of 186 side-by-side 2-hour measurements of PM<sub>2.5</sub> and SHS-VOC tracers;

<sup>d</sup> ratios of concentration of volatile organic compound (C<sub>VOC</sub>) and concentration of 3-Ethenylpyridine (3EP, C<sub>3EP</sub>) were from simple linear regression analysis of 186 valid side-by-side 2-hour measurements of 3EP and other SHS tracers listed on the table.

## REFERENCES

1. Charles SM, Batterman SA, Jia CR. Composition and emissions of VOCs in main- and side-stream smoke of research cigarettes. *Atmospheric Environment* 2007;**41**:5371-84.
2. Bi XH, Sheng GY, Feng YL, et al. Gas- and particulate-phase specific tracer and toxic organic compounds in environmental tobacco smoke. *Chemosphere* 2005;**61**:1512-22.
3. Singer BC, Hodgson AT, Nazaroff WW. Gas-phase organics in environmental tobacco smoke: 2. Exposure-relevant emission factors and indirect exposures from habitual smoking. *Atmospheric Environment* 2003;**37**:5551-61.
4. Singer BC, Hodgson AT, Guevarra KS, et al. Gas-phase organics in environmental tobacco smoke. 1. Effects of smoking rate, ventilation, and furnishing level on emission factors. *Environmental Science & Technology* 2002;**36**:846-53.
5. Daisey JM. Tracers for assessing exposure to environmental tobacco smoke: What are they tracing? *Environ Health Persp* 1999;**107**:319-27.
6. Hodgson AT, Daisey JM, Mahanama KRR, et al. Use of volatile tracers to determine the contribution of environmental tobacco smoke to concentrations of volatile organic compounds in smoking environments. *Environment International* 1996;**22**:295-307.
7. Mahanama KRR, Daisey JM. Volatile N-nitrosamines in environmental tobacco smoke: Sampling, analysis, emission factors, and indoor air exposures. *Environmental Science & Technology* 1996;**30**:1477-84.
8. Nelson PR, Kelly SP, Conrad FW. Studies of environmental tobacco smoke generated by different cigarettes. *Journal of the Air & Waste Management Association* 1998;**48**:336-44.
9. Martin P, Heavner DL, Nelson PR, et al. Environmental tobacco smoke (ETS): A market cigarette study. *Environment International* 1997;**23**:75-90.
10. Leaderer BP, Hammond SK. Evaluation of Vapor-Phase Nicotine and Respirable Suspended Particle Mass as Markers for Environmental Tobacco-Smoke. *Environmental Science & Technology* 1991;**25**:770-7.
